# Supplementary material
Source: publisher site journal article supplement (http://www.kjim.org/upload/media/kjim-2022-050-suppl2.pdf)
Supplement: Supplementary file 1 [file kjim-2022-050-suppl2.pdf]

**Supplementary Table 2. Number of tests performed according to the classification of days after the onset of symptoms**

| Patient no. | Chest CT, day |       |        | PFT, day |       |        | Serum sample collection, day |      |       |       |        |         |         |
|-------------|---------------|-------|--------|----------|-------|--------|------------------------------|------|-------|-------|--------|---------|---------|
|             | 1-14          | 15-60 | 61-365 | 1-14     | 15-60 | 61-365 | 1-7                          | 8-14 | 15-21 | 22-60 | 61-120 | 121-180 | 181-365 |
| 1           | 0             | 0     | 0      | 0        | 0     | 0      | 0                            | 0    | 00    |       |        | 0       |         |
| 2           | 0             | 0     | 0      | 0        | 0     | 0      | 0                            | 0    |       |       |        |         | 0       |
| 3           |               | 0     | 0      | 0        | 0     | 0      | 0                            | 0    |       |       | 0      |         |         |
| 4           | 0             | 0     | 0      | 0        | 0     | 0      | 0                            | 0    |       |       |        |         | 0       |
| 5           | 0             | 0     | 0      | 0        | 0     | 0      | 0                            | 0    |       |       | 0      |         |         |
| 6           |               |       | 0      | 0        | 0     | 0      | 0                            | 0    |       |       | 0      |         |         |
| 7           | 0             |       | 0      | 0        | 0     | 0      | 0                            | 0    | 0     | 0     |        |         |         |
| 8           | 0             | 00    | 0      | 0        | 0     | 0      | 0                            | 00   | 0     | 0     |        |         | 0       |
| 9           | 0             | 00    | 000    | 0        | 0     | 0      | 0                            | 00   |       |       |        |         | 0       |
| 10          | 0             | 0     | 0      | 0        | 0     | 0      | 0                            | 00   | 0     | 0     | 0      |         |         |
| 11          | 00            |       | 0      | 0        | 0     | 0      | 0                            | 00   |       |       | 0      |         |         |
| 12          |               | 0     | 0      | 0        | 0     | 0      | 0                            | 0000 |       |       |        |         |         |
| 13          | 0             | 0     | 0      | 0        | 0     | 0      | 0                            | 00   | 0     | 0     |        |         |         |
| 14          | 0             |       | 0      | 0        | 0     | 0      | 0                            | 0    |       |       | 0      |         |         |
| 15          | 0             | 00    | 0      | 0        | 0     | 0      | 0                            | 00   | 00    |       |        |         |         |
| 16          | 0             | 0     | 0      | 0        | 0     | 0      | 0                            | 0    | 0     | 0     |        | 0       |         |
| 17          | 0             | 0     |        |          | 0     |        | 0                            | 0    | 00    | 0     |        |         |         |
| 18          | 0             | 0     | 00     | 0        | 0     | 0      | 0                            |      |       |       |        |         | 0       |
| 19          | 0             | 0     | 0      | 0        | 0     | 0      | 0                            | 0    | 00    | 0     |        |         |         |
| 20          |               | 0     |        |          | 0     |        |                              |      | 0     |       |        |         |         |
| 21          |               |       | 0      |          |       | 0      |                              |      |       |       | 0      |         |         |
| 22          |               | 00    |        |          | 0     |        |                              | 0    | 0     | 0     | 0      |         |         |
| 23          | 0             | 00    |        |          | 0     |        |                              | 0    | 00    | 00    |        |         |         |
| 24          | 0             | 0     | 0      | 0        | 0     | 0      | 0                            | 0    | 0     | 0     | 0      |         |         |
| 25          | 0             | 0     | 0      | 0        | 0     | 0      | 0                            | 0    | 0     | 0     | 0      |         |         |
| 26          |               |       | 0      |          |       | 0      |                              |      |       |       | 0      |         |         |
| 27          |               | 0     |        |          | 0     |        |                              |      | 0     |       |        |         |         |
| 28          |               |       | 0      |          |       | 0      |                              |      |       |       |        | 0       |         |
| 29          |               |       | 0      |          |       | 0      |                              |      |       |       | 0      |         |         |
| 30          | 0             |       | 0      |          |       | 0      |                              |      |       |       | 0      |         |         |

**Supplementary Table 2. continued.**

| Patient no. | Chest CT, day |       |        | PFT, day |       |        | Serum sample collection, day |      |       |       |        |         |         |
|-------------|---------------|-------|--------|----------|-------|--------|------------------------------|------|-------|-------|--------|---------|---------|
|             | 1-14          | 15-60 | 61-365 | 1-14     | 15-60 | 61-365 | 1-7                          | 8-14 | 15-21 | 22-60 | 61-120 | 121-180 | 181-365 |
| 31          | 0             |       | 0      |          |       |        |                              |      |       |       | 0      |         |         |
| 32          |               |       | 0      |          |       |        |                              |      |       |       | 0      |         |         |
| 33          |               |       | 0      |          |       |        |                              |      |       |       |        | 0       |         |
| 34          |               |       | 0      |          |       |        |                              |      |       |       |        | 0       |         |
| 35          |               |       | 0      |          |       |        |                              |      |       |       |        | 0       |         |

When the same test was performed multiple times for each patient, the last test was performed during the study period.  
 CT, computed tomography; PFT, pulmonary function test.
